# Supplementary material for: RNA-Seq Data Mining: Downregulation of NeuroD6 Serves as a Possible Biomarker for Alzheimer’s Disease Brains
Source: Hindawi journal article supplement (doi:10.1155/2014/123165), 2014-01-01
Supplement: f1 [file 123165.f1.pdf]

**(a) Log2(NeuroD6) ROC curve**

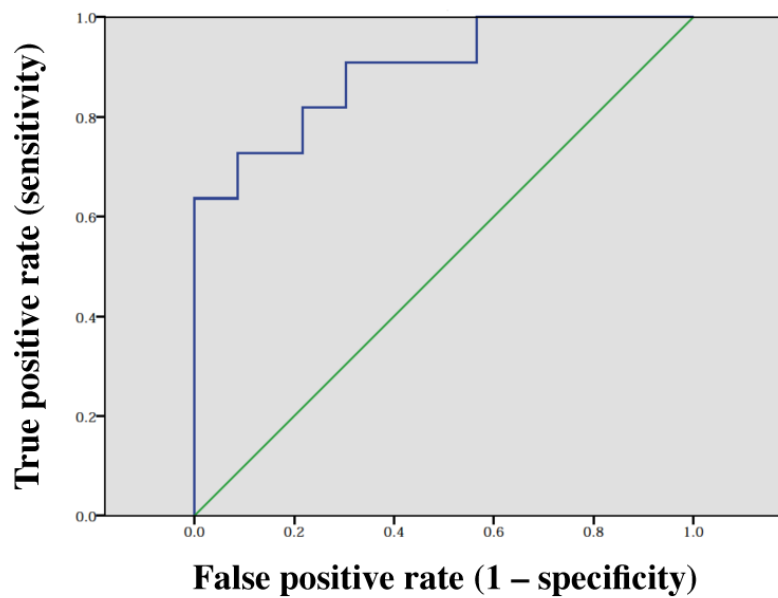

**(b) Log2(NeuroD1) ROC curve**

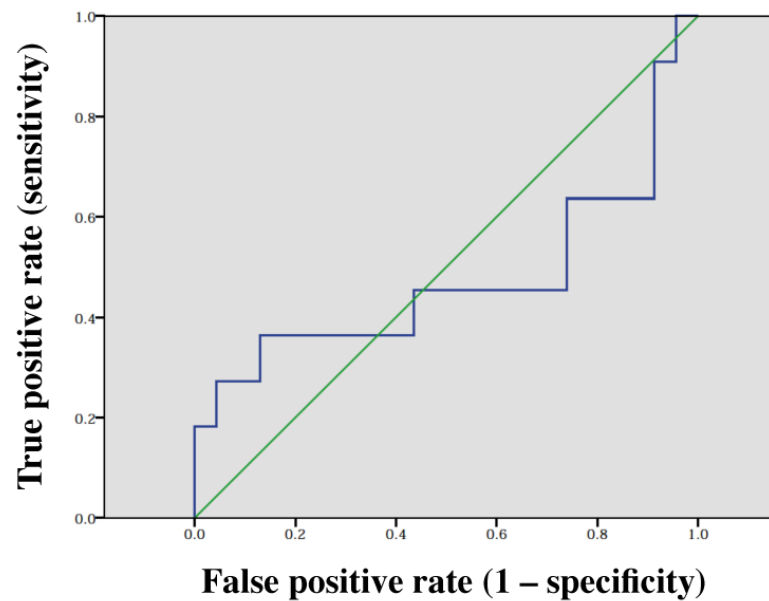

**Supplementary Figure 1**











|           |          |                                                                                                     |                           |             |            |             |             |
|-----------|----------|-----------------------------------------------------------------------------------------------------|---------------------------|-------------|------------|-------------|-------------|
| 25959     | KANK2    | KN motif and ankyrin repeat domains 2                                                               | chr19:11274791-11308243   | 2.812708414 | 0.00232257 | 3.056202208 | 0.000638422 |
| 58475     | MS4A7    | membrane-spanning 4-domains, subfamily A, member 7                                                  | chr11:60145957-60185228   | 2.909860517 | 0.00654308 | 2.374609032 | 0.00163713  |
| 6876      | TAGLN    | transgelin                                                                                          | chr11:117070039-117075508 | 2.918748695 | 0.00232257 | 2.465585017 | 0.000638422 |
| 9457      | FHL5     | four and a half LIM domains 5                                                                       | chr6:97010423-97071054    | 2.923729822 | 0.00654308 | 10.50620693 | 0.000638422 |
| 2828      | GPR4     | G protein-coupled receptor 4                                                                        | chr19:46093022-46105466   | 3.075902983 | 0.00962874 | 2.233289068 | 0.00287725  |
| 150946    | FAM59B   | family with sequence similarity 59, member B                                                        | chr2:26395959-26413241    | 3.093628585 | 0.00232257 | 2.901783731 | 0.000638422 |
| 2872      | MKMK2    | MAP kinase interacting serine/threonine kinase 2                                                    | chr19:2037463-2051243     | 3.139881255 | 0.00762148 | 2.229793331 | 0.00287725  |
| 283755    | HERC2P3  | hect domain and RLD 2 pseudogene 3                                                                  | chr15:20586683-20711433   | 3.172697556 | 0.00232257 | 6.604594557 | 0.000638422 |
| 134549    | SHROOM1  | shroom family member 1                                                                              | chr5:132157663-132166703  | 3.256833576 | 0.00232257 | 2.504877412 | 0.000638422 |
| 353514    | LILRA5   | leukocyte immunoglobulin-like receptor, subfamily A (with TM domain), member 5                      | chr19:54818352-54824409   | 3.294272731 | 0.00232257 | 6.066986075 | 0.00396642  |
| 59        | ACTA2    | actin, alpha 2, smooth muscle, aorta                                                                | chr10:90694830-90777253   | 3.402251992 | 0.00865834 | 2.914806272 | 0.00825241  |
| 845       | CASQ2    | calsequestrin 2 (cardiac muscle)                                                                    | chr1:116242519-116345204  | 3.491410523 | 0.00962874 | 5.322706439 | 0.000638422 |
| 23704     | KCNE4    | potassium voltage-gated channel, Isk-related family, member 4                                       | chr2:223916861-223920355  | 4.436801472 | 0.00232257 | 4.699574041 | 0.000638422 |
| 6279      | SI00A8   | SI00 calcium binding protein A8                                                                     | chr1:153362507-153363664  | 5.018965399 | 0.00232257 | 2.142150734 | 0.0151369   |
| 871       | SERPINH1 | serpin peptidase inhibitor, clade H (heat shock protein 47), member 1, (collagen binding protein 1) | chr11:75273100-75283870   | 5.437863735 | 0.00232257 | 2.129345418 | 0.0101566   |
| 6275      | SI00A4   | SI00 calcium binding protein A4                                                                     | chr1:153516094-153518282  | 5.52659158  | 0.00232257 | 4.606560625 | 0.000638422 |
| 26266     | SLC13A4  | solute carrier family 13 (sodium/sulfate symporters), member 4                                      | chr7:135365246-135412933  | 6.580968881 | 0.00232257 | 2.996233377 | 0.000638422 |
| 3303      | HSPA1A   | heat shock 70kDa protein 1A                                                                         | chr6:31777395-31785719    | 6.599057552 | 0.00232257 | 3.8880048   | 0.000638422 |
| 3304      | HSPA1B   | heat shock 70kDa protein 1B                                                                         | chr6:31795511-31798031    | 6.599057552 | 0.00232257 | 2.366327899 | 0.000638422 |
| 375061    | FAM89A   | family with sequence similarity 89, member A                                                        | chr1:231154703-231175995  | 8.186858725 | 0.00232257 | 2.253222839 | 0.00248927  |
| 100500849 | MIR3916  | microRNA 3916                                                                                       | chr1:247342111-247374105  | 17.2291545  | 0.00762148 | 2.127294836 | 0.00287725  |

The core set of 522 DEGs in the frontal cortex of AD overlapping between EMU and UKY satisfying q-Value (FDR-corrected p-Value) < 0.05 and fold change greater than 2.0 or smaller than 0.5 were extracted by RNA-Seq data analysis of SRA060572. They are listed with Entrez Gene ID, Gene Symbol, Gene Name, Chromosomal Locus, Fold Change, and q-Value. NEUROD6 is underlined.

**Supplementary TABLE 2. The set of 60 differentially spliced genes in the frontal cortex of AD identified by RNA-Seq data analysis of SRA060752**

| Entrez Gene ID | Gene Symbol | Gene Name                                                                                         | Chromosome Locus          | Sqrt JS  | q-Value   |
|----------------|-------------|---------------------------------------------------------------------------------------------------|---------------------------|----------|-----------|
| 5797           | PTPRM       | protein tyrosine phosphatase, receptor type, M                                                    | chr18:7567313-8406952     | 0.825781 | 0.0142952 |
| 5468           | PPARG       | peroxisome proliferator-activated receptor gamma                                                  | chr3:12329348-12476009    | 0.735183 | 0.0142952 |
| 2635           | GBP3        | guanylate binding protein 3                                                                       | chr1:89472359-89488549    | 0.727772 | 0.035452  |
| 7516           | XRCC2       | X-ray repair complementing defective repair in Chinese hamster cells 2                            | chr7:152341056-152373250  | 0.721052 | 0.0142952 |
| 23348          | DOCK9       | dedicator of cytokinesis 9                                                                        | chr13:99445739-99738687   | 0.712575 | 0.0142952 |
| 441869         | LOC441869   | hypothetical protein LOC441869                                                                    | chr1:1352433-1357201      | 0.712559 | 0.0142952 |
| 94121          | SYTL4       | synaptotagmin-like 4                                                                              | chrX:99929488-99987135    | 0.706969 | 0.0208722 |
| 5163           | PDK1        | pyruvate dehydrogenase kinase, isozyme 1                                                          | chr2:173420640-173464990  | 0.68768  | 0.0142952 |
| 23332          | CLASP1      | cytoplasmic linker associated protein 1                                                           | chr2:122095164-122407091  | 0.68699  | 0.035452  |
| 25788          | RAD54B      | RAD54 homolog B (S. cerevisiae)                                                                   | chr8:95383956-95487343    | 0.676423 | 0.0302148 |
| 26091          | HERC4       | hect domain and RLD 4                                                                             | chr10:69681655-69835103   | 0.638866 | 0.0142952 |
| 144406         | WDR66       | WD repeat domain 66                                                                               | chr12:122356462-122441832 | 0.626485 | 0.0142952 |
| 26034          | IPCEF1      | interaction protein for cytohesin exchange factors 1                                              | chr6:154331635-154677900  | 0.624585 | 0.0142952 |
| 27124          | INPP5J      | inositol polyphosphate-5-phosphatase J                                                            | chr22:31518727-31530683   | 0.61534  | 0.0142952 |
| 51454          | GULP1       | GULP, engulfment adaptor PTB domain containing 1                                                  | chr2:189156388-189460669  | 0.605783 | 0.0142952 |
| 57125          | PLXDC1      | plexin domain containing 1                                                                        | chr17:37213271-37309211   | 0.586646 | 0.0142952 |
| 57476          | GRAMD1B     | GRAM domain containing 1B                                                                         | chr11:123396297-123498480 | 0.58641  | 0.0142952 |
| 221            | ALDH3B1     | aldehyde dehydrogenase 3 family, member B1                                                        | chr11:67776047-67796852   | 0.580375 | 0.035452  |
| 55036          | CCDC40      | coiled-coil domain containing 40                                                                  | chr17:78010430-78074468   | 0.576498 | 0.0142952 |
| 8120           | AP3B2       | adaptor-related protein complex 3, beta 2 subunit                                                 | chr15:83211862-83378635   | 0.554378 | 0.0142952 |
| 11176          | BAZ2A       | bromodomain adjacent to zinc finger domain, 2A                                                    | chr12:56915608-57030163   | 0.552978 | 0.0208722 |
| 158471         | PRUNE2      | prune homolog 2 (Drosophila)                                                                      | chr9:79224615-79521133    | 0.549799 | 0.0142952 |
| 1503           | CTPS        | CTP synthase                                                                                      | chr1:41445006-41478403    | 0.546957 | 0.0142952 |
| 353189         | SLCO4C1     | solute carrier organic anion transporter family, member 4C1                                       | chr5:101569536-101632253  | 0.544079 | 0.0142952 |
| 6599           | SMARCC1     | SWI/SNF related, matrix associated, actin dependent regulator of chromatin, subfamily c, member 1 | chr3:47627377-47823405    | 0.524068 | 0.0208722 |
| 79000          | AUNIP       | aurora kinase A and ninein interacting protein                                                    | chr1:26159495-26185869    | 0.520829 | 0.0142952 |
| 606495         | CYB5RL      | cytochrome b5 reductase-like                                                                      | chr1:54635094-54665746    | 0.504141 | 0.035452  |
| 6596           | HLTF        | helicase-like transcription factor                                                                | chr3:148747775-148804341  | 0.488028 | 0.0208722 |
| 23114          | NFASC       | neurofascin homolog (chicken)                                                                     | chr1:204797781-204991955  | 0.476222 | 0.0302148 |
| 10919          | EHMT2       | euchromatic histone-lysine N-methyltransferase 2                                                  | chr6:31847534-31865464    | 0.468069 | 0.0142952 |
| 6829           | SUPT5H      | suppressor of Ty 5 homolog (S. cerevisiae)                                                        | chr19:39936185-39967308   | 0.467546 | 0.0142952 |
| 1454           | CSNK1E      | casein kinase 1, epsilon                                                                          | chr22:38686650-38714174   | 0.464769 | 0.0216171 |
| 26038          | CHD5        | chromodomain helicase DNA binding protein 5                                                       | chr1:6161840-6240218      | 0.4647   | 0.0216171 |
| 165918         | RNF168      | ring finger protein 168                                                                           | chr3:196195656-196230639  | 0.455392 | 0.0208722 |
| 64324          | NSD1        | nuclear receptor binding SET domain protein 1                                                     | chr5:176559969-176727214  | 0.448436 | 0.0142952 |
| 9256           | BZRAP1      | benzodiazapine receptor (peripheral) associated protein 1                                         | chr17:56378585-56494931   | 0.422966 | 0.035452  |
| 57478          | USP31       | ubiquitin specific peptidase 31                                                                   | chr16:23072727-23160591   | 0.416776 | 0.0142952 |
| 80255          | SLC35F5     | solute carrier family 35, member F5                                                               | chr2:114464233-114514862  | 0.416096 | 0.0142952 |
| 9760           | TOX         | thymocyte selection-associated high mobility group box                                            | chr8:59717971-60031855    | 0.415069 | 0.0142952 |
| 57631          | LRCH2       | leucine-rich repeats and calponin homology (CH) domain containing 2                               | chrX:114345175-114468635  | 0.411526 | 0.0302148 |
| 55183          | RIF1        | RAP1 interacting factor homolog (yeast)                                                           | chr2:152266396-152334001  | 0.407443 | 0.0208722 |
| 284161         | GDPD1       | glycerophosphodiester phosphodiesterase domain containing 1                                       | chr17:57297827-57353330   | 0.40268  | 0.0208722 |
| 26052          | DNM3        | dynamamin 3                                                                                       | chr1:171810620-172381857  | 0.397641 | 0.0216171 |
| 440823         | MIAT        | myocardial infarction associated transcript (non-protein coding)                                  | chr22:27042837-27072441   | 0.389809 | 0.0208722 |
| 6645           | SNTB2       | syntrophin, beta 2 (dystrophin-associated protein A1, 59kDa, basic component 2)                   | chr16:69221049-69342955   | 0.389015 | 0.0216171 |
| 84864          | MINA        | MYC induced nuclear antigen                                                                       | chr3:97540880-97691295    | 0.385104 | 0.035452  |
| 284677         | C1orf204    | chromosome 1 open reading frame 204                                                               | chr1:159796478-159832447  | 0.371537 | 0.0208722 |
| 391123         | VSIG8       | V-set and immunoglobulin domain containing 8                                                      | chr1:159796478-159832447  | 0.371537 | 0.0208722 |
| 6489           | ST8SIA1     | ST8 alpha-N-acetyl-neuraminide alpha-2,8-sialyltransferase 1                                      | chr12:22346281-22487648   | 0.370318 | 0.0142952 |
| 29801          | ZDHHC8      | zinc finger, DHHC-type containing 8                                                               | chr22:20119363-20135632   | 0.364549 | 0.0216171 |
| 9321           | TRIP11      | thyroid hormone receptor interactor 11                                                            | chr14:92432265-92511291   | 0.364451 | 0.0142952 |
| 9631           | NUP155      | nucleoporin 155kDa                                                                                | chr5:37286396-37371197    | 0.351752 | 0.0142952 |
| 57120          | GOPC        | golgi associated PDZ and coiled-coil motif containing                                             | chr6:117803819-117923705  | 0.347199 | 0.0142952 |
| 55362          | TMEM63B     | transmembrane protein 63B                                                                         | chr6:44095333-44123256    | 0.332719 | 0.0216171 |
| 23028          | KDM1A       | lysine (K)-specific demethylase 1                                                                 | chr1:23345940-23410184    | 0.327325 | 0.0216171 |
| 23600          | AMACR       | alpha-methylacyl-CoA racemase                                                                     | chr5:33987090-34124633    | 0.307388 | 0.0142952 |
| 5358           | PLS3        | plastin 3 (T isoform)                                                                             | chrX:114795176-114885179  | 0.303812 | 0.0216171 |
| 55763          | EXOC1       | exocyst complex component 1                                                                       | chr4:56719815-56771244    | 0.303033 | 0.0216171 |
| 80218          | NAA50       | N-acetyltransferase 13 (GCN5-related)                                                             | chr3:113432171-113465120  | 0.248626 | 0.0142952 |
| 23276          | KLHL18      | kelch-like 18 (Drosophila)                                                                        | chr3:47205859-47392593    | 0.242977 | 0.0216171 |

Differentially spliced genes in the frontal cortex compared between AD versus NC derived from EMU and UKY extracted by RNA-Seq data analysis of SRA060752 were combined. The spliced genes satisfying q-Value (FDR-corrected p-Value) < 0.05 are listed with Entrez Gene ID, Gene Symbol, Gene Name, Chromosomal Locus, the square root of the Jensen-Shannon divergence (Sqrt JS), and q-Value.



**Supplementary TABLE 3. The set of 215 DEGs in cortical neurons of the superior frontal gyrus of AD identified by microarray data analysis of GSE5281**

| Entrez Gene ID | Gene Symbol | Gene Title                                                                        | Fold Change (AD vs NC) | p-Value     |
|----------------|-------------|-----------------------------------------------------------------------------------|------------------------|-------------|
| 116            | ADCYAP1     | adenylate cyclase activating polypeptide 1 (pituitary)                            | 0.069636923            | 1.26039E-07 |
| 6750           | SST         | somatostatin                                                                      | 0.078547047            | 2.49899E-05 |
| 25859          | PART1       | prostate androgen-regulated transcript 1 (non-protein coding)                     | 0.09979003             | 7.81005E-07 |
| 10556          | RPP30       | ribonuclease P/MRP 30kDa subunit                                                  | 0.121421574            | 1.15361E-05 |
| 7306           | TYRP1       | tyrosinase-related protein 1                                                      | 0.12391224             | 2.91523E-06 |
| 729870         | LOC729870   | uncharacterized LOC729870                                                         | 0.125916106            | 1.14639E-07 |
| 10001          | MED6        | mediator complex subunit 6                                                        | 0.127676215            | 1.04388E-05 |
| 5771           | PTPN2       | protein tyrosine phosphatase, non-receptor type 2                                 | 0.129512873            | 1.61631E-05 |
| 126068         | ZNF441      | zinc finger protein 441                                                           | 0.135568912            | 3.65191E-06 |
| 9040           | UBE2M       | ubiquitin-conjugating enzyme E2M (UBC12 homolog, yeast)                           | 0.140010654            | 9.52306E-06 |
| 2563           | GABRD       | gamma-aminobutyric acid (GABA) A receptor, delta                                  | 0.142042327            | 2.57797E-05 |
| 57452          | GALNT16     | polypeptide N-acetylgalactosaminyltransferase 16                                  | 0.143744955            | 8.22479E-06 |
| 1412           | CRYBA2      | crystallin, beta A2                                                               | 0.145842233            | 9.60478E-05 |
| 53918          | PELO        | pelota homolog (Drosophila)                                                       | 0.147274585            | 3.97322E-05 |
| 10777          | ARPP21      | cAMP-regulated phosphoprotein, 21kDa                                              | 0.1474134              | 4.52823E-06 |
| 64105          | CENPK       | centromere protein K                                                              | 0.148647796            | 2.45922E-05 |
| 158228         | FAM201A     | family with sequence similarity 201, member A                                     | 0.149625358            | 3.40468E-08 |
| 196294         | IMMP1L      | IMP1 inner mitochondrial membrane peptidase-like (S. cerevisiae)                  | 0.15002806             | 1.03281E-05 |
| 158326         | FREM1       | FRAS1 related extracellular matrix 1                                              | 0.15200796             | 2.39567E-07 |
| 283401         | FLJ33996    | Hypothetical protein FLJ33996                                                     | 0.154423179            | 2.77206E-05 |
| 8754           | ADAM9       | ADAM metalloproteinase domain 9                                                   | 0.154955285            | 3.00411E-07 |
| 6511           | SLC1A6      | solute carrier family 1 (high affinity aspartate/glutamate transporter), member 6 | 0.156759363            | 4.74541E-05 |
| 5605           | MAP2K2      | mitogen-activated protein kinase kinase 2                                         | 0.157368364            | 6.95049E-06 |
| 51230          | PHF20       | PHD finger protein 20                                                             | 0.157471386            | 2.87845E-05 |
| 5600           | MAPK11      | mitogen-activated protein kinase 11                                               | 0.16197929             | 3.94138E-08 |
| 81573          | ANKRD13C    | ankyrin repeat domain 13C                                                         | 0.165393484            | 9.22967E-05 |
| 221264         | AKD1        | adenylate kinase domain containing 1                                              | 0.167076883            | 2.44999E-05 |
| 8539           | API5        | apoptosis inhibitor 5                                                             | 0.169466               | 6.32302E-05 |
| 57379          | AICDA       | activation-induced cytidine deaminase                                             | 0.171641877            | 6.25246E-07 |
| 728192         | LINC00460   | long intergenic non-protein coding RNA 460                                        | 0.171656016            | 8.49002E-07 |
| 201626         | PDE12       | Phosphodiesterase 12                                                              | 0.172443023            | 1.6E-05     |
| 23304          | UBR2        | ubiquitin protein ligase E3 component n-recogin 2                                 | 0.17290985             | 4.0324E-05  |
| 90632          | C6orf176    | chromosome 6 open reading frame 176                                               | 0.174179808            | 1.05824E-05 |
| 256471         | MFSD8       | major facilitator superfamily domain containing 8                                 | 0.178004149            | 3.08466E-06 |
| 1846           | DUSP4       | dual specificity phosphatase 4                                                    | 0.180708065            | 3.17436E-05 |
| 56915          | EXOSC5      | exosome component 5                                                               | 0.18089212             | 4.4006E-05  |
| 81602          | CDADC1      | cytidine and dCMP deaminase domain containing 1                                   | 0.181221497            | 5.63843E-06 |
| 22843          | PPM1E       | protein phosphatase, Mg2+/Mn2+ dependent, 1E                                      | 0.181354038            | 9.88435E-05 |
| 891            | CCNB1       | cyclin B1                                                                         | 0.182817517            | 1.34014E-05 |
| 2762           | GMDS        | GDP-mannose 4,6-dehydratase                                                       | 0.183086528            | 3.97601E-06 |
| 7062           | TCHH        | trichohyalin                                                                      | 0.183269147            | 9.68165E-06 |
| 6835           | SURF2       | surfeit 2                                                                         | 0.184390125            | 3.26572E-05 |
| 81491          | GPR63       | G protein-coupled receptor 63                                                     | 0.186613153            | 3.74939E-05 |
| 55172          | C14orf104   | chromosome 14 open reading frame 104                                              | 0.186734612            | 8.42116E-07 |
| 3914           | LAMB3       | laminin, beta 3                                                                   | 0.189677043            | 4.52811E-06 |
| 523            | ATP6V1A     | ATPase, H+ transporting, lysosomal 70kDa, V1 subunit A                            | 0.190442377            | 8.45909E-05 |
| 51086          | TNNI3K      | TNNI3 interacting kinase                                                          | 0.192973193            | 1.79598E-05 |
| 169200         | TMEM164     | transmembrane protein 64                                                          | 0.193218848            | 4.05358E-06 |
| 9734           | HDAC9       | histone deacetylase 9                                                             | 0.19323932             | 1.28179E-05 |
| 79693          | YRDC        | yrdC domain containing (E. coli)                                                  | 0.193557047            | 8.18589E-07 |
| 4801           | NFYB        | nuclear transcription factor Y, beta                                              | 0.194719115            | 3.02116E-05 |
| 93426          | SYCE1       | synaptonemal complex central element protein 1                                    | 0.195656453            | 1.51885E-05 |
| 84520          | C14orf142   | chromosome 14 open reading frame 142                                              | 0.19704676             | 2.13813E-05 |
| 9481           | SLC25A27    | solute carrier family 25, member 27                                               | 0.198188373            | 8.25666E-05 |
| 6708           | SPTA1       | spectrin, alpha, erythrocytic 1 (elliptocytosis 2)                                | 0.198230692            | 1.01877E-05 |
| 2936           | GSR         | glutathione reductase                                                             | 0.199527565            | 1.63443E-06 |
| 10562          | OLFM4       | olfactomedin 4                                                                    | 0.199647096            | 1.15847E-05 |
| 7991           | TUSC3       | tumor suppressor candidate 3                                                      | 0.200399391            | 3.74354E-05 |
| 10681          | GNB5        | guanine nucleotide binding protein (G protein), beta 5                            | 0.201370766            | 5.0234E-05  |
| 23040          | MYT1L       | myelin transcription factor 1-like                                                | 0.204647283            | 8.31875E-05 |
| 22901          | ARSG        | arylsulfatase G                                                                   | 0.208725376            | 5.32396E-05 |
| 10279          | PRSS16      | protease, serine, 16 (thymus)                                                     | 0.210284553            | 7.90389E-05 |
| 54939          | COMM4       | COMM domain containing 4                                                          | 0.210664422            | 4.94578E-05 |
| 1770           | DNAH9       | dynein, axonemal, heavy chain 9                                                   | 0.212595043            | 9.92987E-06 |
| 894            | CCND2       | cyclin D2                                                                         | 0.213765457            | 6.53823E-05 |
| 7356           | SCGB1A1     | secretoglobin, family 1A, member 1 (uteroglobulin)                                | 0.214429919            | 7.1649E-05  |
| 283484         | LOC283484   | uncharacterized LOC283484                                                         | 0.216069327            | 3.39563E-05 |
| 57650          | KIAA1524    | KIAA1524                                                                          | 0.216374441            | 1.19481E-05 |
| 4139           | MARK1       | MAP/microtubule affinity-regulating kinase 1                                      | 0.217306843            | 9.01463E-05 |
| 27098          | CLUL1       | clusterin-like 1 (retinal)                                                        | 0.217430566            | 1.7684E-05  |
| 8301           | PICALM      | phosphatidylinositol binding clathrin assembly protein                            | 0.218691398            | 9.96687E-06 |
| 55110          | MAGOHB      | mago-nashi homolog B (Drosophila)                                                 | 0.21950427             | 5.82891E-05 |
| 163081         | ZNF567      | zinc finger protein 567                                                           | 0.219687149            | 4.08174E-05 |
| 80700          | UBXN6       | UBX domain protein 6                                                              | 0.22029261             | 5.64717E-05 |
| 1731           | SEPT1       | septin 1                                                                          | 0.220367831            | 4.45004E-05 |
| 54414          | SIAE        | sialic acid acetyltransferase                                                     | 0.222876791            | 6.67167E-05 |

|              |                |                                                                                          |                    |                    |
|--------------|----------------|------------------------------------------------------------------------------------------|--------------------|--------------------|
| 1741         | DLG3           | discs, large homolog 3 (Drosophila)                                                      | 0.222930685        | 8.59311E-06        |
| 152756       | C4orf39        | chromosome 4 open reading frame 39                                                       | 0.222995615        | 8.84069E-06        |
| 169270       | ZNF596         | zinc finger protein 596                                                                  | 0.223311428        | 7.30718E-06        |
| 5567         | PRKACB         | protein kinase, cAMP-dependent, catalytic, beta                                          | 0.224140879        | 2.69271E-05        |
| 9869         | SETDB1         | SET domain, bifurcated 1                                                                 | 0.2253656          | 1.81497E-05        |
| 7270         | TTF1           | transcription termination factor, RNA polymerase I                                       | 0.226659218        | 2.28839E-05        |
| 2794         | GNL1           | guanine nucleotide binding protein-like 1                                                | 0.226797093        | 3.09869E-06        |
| 23332        | CLASP1         | Cytoplasmic linker associated protein 1                                                  | 0.226910712        | 7.3493E-05         |
| 283310       | C12orf64       | chromosome 12 open reading frame 64                                                      | 0.22780007         | 4.15357E-05        |
| 51275        | C12orf47       | chromosome 12 open reading frame 47                                                      | 0.230619235        | 7.53242E-05        |
| 90317        | ZNF616         | zinc finger protein 616                                                                  | 0.230715995        | 9.38919E-05        |
| 284656       | EPHA10         | EPH receptor A10                                                                         | 0.230742139        | 1.67301E-05        |
| 160518       | DENND5B        | DENN/MADD domain containing 5B                                                           | 0.231022895        | 6.26944E-05        |
| 64398        | MPP5           | membrane protein, palmitoylated 5 (MAGUK p55 subfamily member 5)                         | 0.232247403        | 4.09094E-05        |
| 8543         | LMO4           | LIM domain only 4                                                                        | 0.232544867        | 4.43493E-05        |
| 1982         | EIF4G2         | eukaryotic translation initiation factor 4 gamma, 2                                      | 0.233795543        | 7.04498E-05        |
| 57528        | KCTD16         | potassium channel tetramerisation domain containing 16                                   | 0.234745918        | 5.32779E-05        |
| <b>63974</b> | <b>NEUROD6</b> | <b>neurogenic differentiation 6</b>                                                      | <b>0.237572737</b> | <b>6.60728E-05</b> |
| 51496        | CTDSP2         | CTD (carboxy-terminal domain, RNA polymerase II, polypeptide A) small phosphatase like 2 | 0.240790778        | 2.02993E-05        |
| 79783        | SUGCT          | succinyl-CoA:glutarate-CoA transferase                                                   | 0.241107758        | 3.62348E-05        |
| 51608        | GET4           | golgi to ER traffic protein 4 homolog (S. cerevisiae)                                    | 0.241383495        | 5.94325E-06        |
| 515          | ATP5F1         | ATP synthase, H+ transporting, mitochondrial Fo complex, subunit B1                      | 0.241431174        | 1.40459E-05        |
| 1984         | EIF5A          | eukaryotic translation initiation factor 5A                                              | 0.241553721        | 2.19357E-06        |
| 27319        | BHLHE22        | basic helix-loop-helix family, member e22                                                | 0.242258502        | 8.42321E-05        |
| 147645       | VSIG10L        | V-set and immunoglobulin domain containing 10 like                                       | 0.242683646        | 8.85379E-05        |
| 56993        | TOMM22         | translocase of outer mitochondrial membrane 22 homolog (yeast)                           | 0.243163969        | 5.41726E-06        |
| 56052        | ALG1           | asparagine-linked glycosylation 1, beta-1,4-mannosyltransferase homolog (S. cerevisiae)  | 0.247020898        | 1.48808E-05        |
| 151195       | CCNYL1         | cyclin Y-like 1                                                                          | 0.247698446        | 4.9648E-05         |
| 22948        | CCT5           | chaperonin containing TCP1, subunit 5 (epsilon)                                          | 0.247856464        | 6.15965E-05        |
| 80224        | NUBPL          | nucleotide binding protein-like                                                          | 0.248161621        | 7.20475E-05        |
| 10658        | CELF1          | CUGBP, Elav-like family member 1                                                         | 0.248454389        | 9.33091E-05        |
| 9677         | PIPK5K1        | diphosphoinositol pentakisphosphate kinase 1                                             | 0.249381978        | 1.35708E-07        |
| 3382         | ICA1           | islet cell autoantigen 1, 69kDa                                                          | 0.249762845        | 2.41638E-05        |
| 54148        | MRPL39         | mitochondrial ribosomal protein L39                                                      | 0.25067943         | 8.7033E-05         |
| 55862        | ECHDC1         | enoyl CoA hydratase domain containing 1                                                  | 0.251455215        | 4.37292E-05        |
| 642924       | LINC00535      | long intergenic non-protein coding RNA 535                                               | 0.252893819        | 6.83023E-06        |
| 7881         | KCNAB1         | potassium voltage-gated channel, shaker-related subfamily, beta member 1                 | 0.253379497        | 1.54E-05           |
| 645191       | LINGO3         | leucine rich repeat and Ig domain containing 3                                           | 0.25400303         | 3.56459E-05        |
| 147007       | TMEM199        | transmembrane protein 199                                                                | 0.254036375        | 2.23978E-06        |
| 100132884    | LOC100132884   | uncharacterized LOC100132884                                                             | 0.2546586          | 8.09859E-05        |
| 101928498    | LOC101928498   | uncharacterized LOC101928498                                                             | 0.257003889        | 1.71389E-06        |
| 9470         | EIF4E2         | eukaryotic translation initiation factor 4E family member 2                              | 0.259272145        | 9.46231E-05        |
| 6945         | MLX            | MAX-like protein X                                                                       | 0.260489569        | 6.51217E-05        |
| 10775        | POP4           | processing of precursor 4, ribonuclease P/MRP subunit (S. cerevisiae)                    | 0.260614809        | 7.92389E-06        |
| 286359       | LOC286359      | uncharacterized LOC286359                                                                | 0.261719351        | 1.21654E-05        |
| 51105        | PHF20L1        | PHD finger protein 20-like 1                                                             | 0.261767529        | 3.50347E-05        |
| 100507557    | LOC100507557   | uncharacterized LOC100507557                                                             | 0.262771642        | 8.02713E-05        |
| 51111        | SUV420H1       | suppressor of variegation 4-20 homolog 1 (Drosophila)                                    | 0.263004871        | 4.22888E-05        |
| 1807         | DPYS           | dihydropyrimidinase                                                                      | 0.263121132        | 4.91402E-06        |
| 7336         | UBE2V2         | ubiquitin-conjugating enzyme E2 variant 2                                                | 0.268049344        | 4.64289E-05        |
| 55027        | HEATR3         | HEAT repeat containing 3                                                                 | 0.269701101        | 4.01842E-05        |
| 78991        | PCYOX1L        | prenylcysteine oxidase 1 like                                                            | 0.269715877        | 4.43934E-05        |
| 3419         | IDH3A          | isocitrate dehydrogenase 3 (NAD+) alpha                                                  | 0.271499204        | 9.95633E-05        |
| 9063         | PIAS2          | Protein inhibitor of activated STAT, 2                                                   | 0.271684484        | 4.41772E-05        |
| 1084         | CEACAM3        | carcinoembryonic antigen-related cell adhesion molecule 3                                | 0.271821968        | 5.7677E-05         |
| 844          | CASQ1          | calsequestrin 1 (fast-twitch, skeletal muscle)                                           | 0.271852315        | 3.03481E-05        |
| 10237        | SLC35B1        | solute carrier family 35, member B1                                                      | 0.272823999        | 7.92528E-05        |
| 65244        | SPATS2         | spermatogenesis associated, serine-rich 2                                                | 0.273482519        | 6.42035E-05        |
| 91147        | TMEM67         | transmembrane protein 67                                                                 | 0.273483738        | 8.15071E-05        |
| 285440       | CYP4V2         | cytochrome P450, family 4, subfamily V, polypeptide 2                                    | 0.27381825         | 1.39834E-06        |
| 1785         | DNM2           | dynamain 2                                                                               | 0.274895786        | 2.11917E-05        |
| 29761        | USP25          | ubiquitin specific peptidase 25                                                          | 0.274909483        | 3.05449E-05        |
| 11218        | DDX20          | DEAD (Asp-Glu-Ala-Asp) box polypeptide 20                                                | 0.275382525        | 1.28363E-05        |
| 255352       | C10orf93       | chromosome 10 open reading frame 93                                                      | 0.275661283        | 8.60497E-05        |
| 79183        | TTPAL          | tocopherol (alpha) transfer protein-like                                                 | 0.27810543         | 1.92919E-05        |
| 22869        | ZNF510         | zinc finger protein 510                                                                  | 0.278916363        | 3.72453E-05        |
| 5599         | MAPK8          | mitogen-activated protein kinase 8                                                       | 0.280823911        | 1.47051E-05        |
| 7024         | TFCP2          | transcription factor CP2                                                                 | 0.281014494        | 4.15538E-05        |
| 11130        | ZWINT          | ZW10 interactor                                                                          | 0.281253181        | 2.7161E-07         |
| 9788         | MTSS1          | metastasis suppressor 1                                                                  | 0.282059367        | 5.65722E-05        |
| 129285       | KLRAQ1         | KLRAQ motif containing 1                                                                 | 0.286866593        | 3.05391E-06        |
| 1662         | DDX10          | DEAD (Asp-Glu-Ala-Asp) box polypeptide 10                                                | 0.287532559        | 3.55595E-05        |
| 11034        | DSTN           | Destrin (actin depolymerizing factor)                                                    | 0.287674004        | 2.96698E-05        |
| 6880         | TAF9           | TAF9 RNA polymerase II, TATA box binding protein (TBP)-associated factor, 32kDa          | 0.289512359        | 7.06464E-05        |
| 286144       | C8orf83        | chromosome 8 open reading frame 83                                                       | 0.291989129        | 6.82599E-05        |
| 54039        | PCBP3          | poly(rC) binding protein 3                                                               | 0.292139459        | 9.23825E-05        |
| 5645         | PRSS2          | protease, serine, 2 (trypsin 2)                                                          | 0.29347403         | 3.63464E-05        |
| 84451        | KIAA1804       | mixed lineage kinase 4                                                                   | 0.293869593        | 2.47971E-05        |
| 339965       | CCDC158        | coiled-coil domain containing 158                                                        | 0.294669218        | 9.13572E-06        |
| 22949        | PTGR1          | prostaglandin reductase 1                                                                | 0.295070422        | 2.10552E-05        |

|           |             |                                                                                           |             |             |
|-----------|-------------|-------------------------------------------------------------------------------------------|-------------|-------------|
| 9802      | DAZAP2      | DAZ associated protein 2                                                                  | 0.295709943 | 6.90278E-05 |
| 2170      | FABP3       | fatty acid binding protein 3, muscle and heart (mammary-derived growth inhibitor)         | 0.298322552 | 9.02347E-05 |
| 84557     | MAP1LC3A    | microtubule-associated protein 1 light chain 3 alpha                                      | 0.299830163 | 1.36819E-06 |
| 113174    | SAAL1       | serum amyloid A-like 1                                                                    | 0.30157444  | 7.69427E-06 |
| 56256     | SERTAD4     | SERTA domain containing 4                                                                 | 0.302069796 | 5.66397E-05 |
| 84798     | C19orf48    | chromosome 19 open reading frame 48                                                       | 0.304409689 | 2.50785E-05 |
| 9577      | BRE         | brain and reproductive organ-expressed (TNFRSF1A modulator)                               | 0.306075086 | 9.92354E-05 |
| 84900     | RNFT2       | ring finger protein, transmembrane 2                                                      | 0.306171729 | 4.52424E-05 |
| 261726    | TIPRL       | TIP41, TOR signaling pathway regulator-like (S. cerevisiae)                               | 0.307187952 | 4.81912E-05 |
| 166379    | BBS12       | Bardet-Biedl syndrome 12                                                                  | 0.307793398 | 1.64386E-05 |
| 11144     | DMC1        | DMC1 dosage suppressor of mck1 homolog, meiosis-specific homologous recombination (yeast) | 0.309237619 | 5.48091E-06 |
| 55216     | C11orf57    | chromosome 11 open reading frame 57                                                       | 0.311048275 | 1.04698E-05 |
| 23329     | TBC1D30     | TBC1 domain family, member 30                                                             | 0.31573145  | 5.64438E-05 |
| 8745      | ADAM23      | ADAM metalloproteinase domain 23                                                          | 0.317318146 | 4.87044E-05 |
| 84142     | FAM175A     | family with sequence similarity 175, member A                                             | 0.318203448 | 2.67463E-05 |
| 55786     | ZNF415      | zinc finger protein 415                                                                   | 0.320643226 | 2.88337E-05 |
| 401442    | LOC401442   | uncharacterized LOC401442                                                                 | 0.323075963 | 3.91753E-05 |
| 80820     | EEDP1       | endonuclease/exonuclease/phosphatase family domain containing 1                           | 0.323089105 | 5.1179E-05  |
| 23185     | LARP4B      | La ribonucleoprotein domain family, member 4B                                             | 0.323170088 | 4.43628E-05 |
| 92        | ACVR2A      | activin A receptor, type IIA                                                              | 0.327396714 | 6.95311E-06 |
| 154215    | NKAIN2      | Na <sup>+</sup> /K <sup>+</sup> transporting ATPase interacting 2                         | 0.327625458 | 7.47158E-05 |
| 162394    | SLFN5       | schlafen family member 5                                                                  | 0.327952908 | 9.92377E-05 |
| 79644     | SRD5A3      | steroid 5 alpha-reductase 3                                                               | 0.328233834 | 5.36134E-05 |
| 135295    | SRSF12      | serine/arginine-rich splicing factor 12                                                   | 0.330721489 | 3.56501E-05 |
| 8417      | STX7        | syntaxin 7                                                                                | 0.331856143 | 4.05275E-05 |
| 8882      | ZNF259      | zinc finger protein 259                                                                   | 0.332476459 | 4.81463E-06 |
| 11143     | MYST2       | MYST histone acetyltransferase 2                                                          | 0.332553475 | 7.67737E-05 |
| 441061    | MARCH11     | membrane-associated ring finger (C3HC4) 11                                                | 0.333104755 | 3.48392E-05 |
| 168667    | BMPER       | BMP binding endothelial regulator                                                         | 0.333885173 | 6.68363E-05 |
| 151194    | FAM119A     | family with sequence similarity 119, member A                                             | 0.334401486 | 8.06696E-05 |
| 9329      | GTF3C4      | general transcription factor IIC, polypeptide 4, 90kDa                                    | 0.3354717   | 3.24135E-05 |
| 60526     | C2orf43     | chromosome 2 open reading frame 43                                                        | 0.336549456 | 1.18393E-05 |
| 8498      | RANBP3      | RAN binding protein 3                                                                     | 0.336838662 | 4.15908E-05 |
| 8798      | DYRK4       | dual-specificity tyrosine-(Y)-phosphorylation regulated kinase 4                          | 0.342786093 | 4.27269E-05 |
| 8396      | PIP4K2B     | phosphatidylinositol-5-phosphate 4-kinase, type II, beta                                  | 0.346321233 | 7.98368E-05 |
| 26002     | MOXD1       | monooxygenase, DBH-like 1                                                                 | 0.350988747 | 8.95184E-05 |
| 6419      | SETMAR      | SET domain and mariner transposase fusion gene                                            | 0.35787671  | 2.36463E-05 |
| 23096     | IQSEC2      | IQ motif and Sec7 domain 2                                                                | 0.358468105 | 8.59696E-05 |
| 3754      | KCNF1       | potassium voltage-gated channel, subfamily F, member 1                                    | 0.359533309 | 4.95636E-05 |
| 9515      | STXBPSL     | syntaxin binding protein 5-like                                                           | 0.360338998 | 8.58457E-05 |
| 47        | ACLY        | ATP citrate lyase                                                                         | 0.361128893 | 9.52106E-05 |
| 55973     | BCAP29      | B-cell receptor-associated protein 29                                                     | 0.3634238   | 5.20388E-05 |
| 9131      | AIFM1       | apoptosis-inducing factor, mitochondrion-associated, 1                                    | 0.368230385 | 6.62156E-05 |
| 388272    | C16orf87    | chromosome 16 open reading frame 87                                                       | 0.371197394 | 1.52935E-05 |
| 11285     | B4GALT7     | xylosylprotein beta 1,4-galactosyltransferase, polypeptide 7 (galactosyltransferase I)    | 0.372874153 | 7.20649E-06 |
| 91543     | RSAD2       | radical S-adenosyl methionine domain containing 2                                         | 0.383620394 | 8.54968E-05 |
| 23184     | MESDC2      | mesoderm development candidate 2                                                          | 0.39605989  | 3.45543E-05 |
| 23041     | MON2        | MON2 homolog (S. cerevisiae)                                                              | 0.404470706 | 8.63572E-05 |
| 22929     | SEPHS1      | selenophosphate synthetase 1                                                              | 0.404606953 | 3.40831E-05 |
| 81545     | FBXO38      | F-box protein 38                                                                          | 0.416551062 | 4.34948E-05 |
| 10360     | NPM3        | nucleophosmin/nucleoplasm 3                                                               | 0.417979562 | 2.84678E-05 |
| 100303728 | SLC25A5-AS1 | SLC25A5 antisense RNA 1                                                                   | 0.436709024 | 8.65633E-05 |
| 8111      | GPR68       | G protein-coupled receptor 68                                                             | 0.442242867 | 7.38844E-05 |
| 54884     | RETSAT      | retinol saturase (all-trans-retinol 13,14-reductase)                                      | 0.460077878 | 1.06392E-05 |
| 720       | C4A         | complement component 4A (Rodgers blood group)                                             | 2.992510275 | 8.64066E-05 |
| 9117      | SEC22C      | SEC22 vesicle trafficking protein homolog C (S. cerevisiae)                               | 3.326491174 | 2.84927E-05 |
| 56288     | PARD3       | par-3 family cell polarity regulator                                                      | 3.762403671 | 1.03744E-05 |
| 94        | ACVRL1      | activin A receptor type II-like 1                                                         | 5.081871823 | 7.65974E-05 |
| 202181    | LOC202181   | SUMO-interacting motifs containing 1 pseudogene                                           | 6.913531993 | 5.09011E-06 |

The set of 215 DEGs in LCM-captured cortical neurons of the superior frontal gyrus of AD satisfying p-Value < 0.0001 by two-tailed t-test and fold change greater than 2 or smaller than 0.5 were extracted by microarray data analysis of GSE5281. They are listed with Entrez Gene ID, Gene Symbol, Gene Name, Fold Change, and p-Value. NEUROD6 is underlined.

**Supplementary TABLE 4. The set of 131 DEGs downregulated in the hippocampal CA1 region during progression of AD identified by microarray data analysis of GSE1297**

| Entrez Gene ID | Gene Symbol | Gene Name                                                                                            | Fold Change (Severe AD vs NC) | p-Value     |
|----------------|-------------|------------------------------------------------------------------------------------------------------|-------------------------------|-------------|
| 57172          | CAMK1G      | calcium/calmodulin-dependent protein kinase IG                                                       | 0.119791216                   | 0.00015044  |
| 1290           | COL5A2      | collagen, type V, alpha 2                                                                            | 0.137353439                   | 0.003310089 |
| 7447           | VSNL1       | visinin-like 1                                                                                       | 0.176659556                   | 0.003811085 |
| 4253           | CTAGE5      | CTAGE family, member 5                                                                               | 0.187301453                   | 0.000234565 |
| 11161          | C14orf1     | chromosome 14 open reading frame 1                                                                   | 0.200480779                   | 0.005009542 |
| 56603          | CYP26B1     | cytochrome P450, family 26, subfamily B, polypeptide 1                                               | 0.209620966                   | 0.001291311 |
| 10675          | CSPG5       | chondroitin sulfate proteoglycan 5 (neuroglycan C)                                                   | 0.212310725                   | 0.003058062 |
| 10368          | CACNG3      | calcium channel, voltage-dependent, gamma subunit 3                                                  | 0.212906942                   | 0.000645324 |
| 2115           | ETV1        | ets variant 1                                                                                        | 0.22931704                    | 0.000240241 |
| 55711          | FAR2        | fatty acyl CoA reductase 2                                                                           | 0.230090829                   | 0.00066547  |
| 324            | APC         | adenomatous polyposis coli                                                                           | 0.240819317                   | 0.000639442 |
| 1716           | DGUOK       | deoxyguanosine kinase                                                                                | 0.245686681                   | 0.001149261 |
| 10197          | PSME3       | proteasome (prosome, macropain) activator subunit 3 (PA28 gamma; Ki)                                 | 0.251903297                   | 0.001593785 |
| 9378           | NRXN1       | neurexin 1                                                                                           | 0.260881827                   | 0.009477858 |
| 1795           | DOCK3       | dedicator of cytokinesis 3                                                                           | 0.261184326                   | 0.005551229 |
| 545            | ATR         | ataxia telangiectasia and Rad3 related                                                               | 0.262908596                   | 0.003036901 |
| 10769          | PLK2        | polo-like kinase 2                                                                                   | 0.264329482                   | 0.001588852 |
| 23026          | MYO16       | myosin XVI                                                                                           | 0.264525437                   | 0.003540514 |
| 6623           | SNCG        | synuclein, gamma (breast cancer-specific protein 1)                                                  | 0.266115782                   | 0.002115945 |
| 3084           | NRG1        | neuregulin 1                                                                                         | 0.266870545                   | 0.001406226 |
| 27292          | DIMT1L      | DIM1 dimethyladenosine transferase 1-like (S. cerevisiae)                                            | 0.275042863                   | 0.002562807 |
| 6715           | SRD5A1      | steroid-5-alpha-reductase, alpha polypeptide 1 (3-oxo-5 alpha-steroid delta 4-dehydrogenase alpha 1) | 0.282086506                   | 0.001299877 |
| 9331           | B4GALT6     | UDP-Gal:betaGlcNAc beta 1,4- galactosyltransferase, polypeptide 6                                    | 0.284246871                   | 0.005450676 |
| 11197          | WIF1        | WNT inhibitory factor 1                                                                              | 0.290913711                   | 0.001653579 |
| 286            | ANK1        | ankyrin 1, erythrocytic                                                                              | 0.295816536                   | 0.009830239 |
| 3040           | HBA2        | hemoglobin, alpha 2                                                                                  | 0.299863012                   | 0.004878631 |
| 5132           | PDC         | phosducin                                                                                            | 0.301022115                   | 0.003171501 |
| 55521          | TRIM36      | tripartite motif-containing 36                                                                       | 0.303428631                   | 0.002870895 |
| 11178          | LZTS1       | leucine zipper, putative tumor suppressor 1                                                          | 0.318678801                   | 0.000656311 |
| 3043           | HBB         | hemoglobin, beta                                                                                     | 0.320523818                   | 0.005373169 |
| 55312          | RFK         | riboflavin kinase                                                                                    | 0.326351561                   | 0.000250327 |
| 4741           | NEFM        | neurofilament, medium polypeptide                                                                    | 0.334625635                   | 0.001051236 |
| 5274           | SERPINI1    | serpin peptidase inhibitor, clade I (neuroserpin), member 1                                          | 0.337526915                   | 0.006332563 |
| 9409           | PEX16       | peroxisomal biogenesis factor 16                                                                     | 0.338900118                   | 0.000820529 |
| 9079           | LDB2        | LIM domain binding 2                                                                                 | 0.340999225                   | 0.003326867 |
| 1268           | CNR1        | cannabinoid receptor 1 (brain)                                                                       | 0.344653589                   | 0.008057005 |
| 5579           | PRKCB       | protein kinase C, beta                                                                               | 0.345004889                   | 0.002186833 |
| 80742          | PRR3        | proline rich 3                                                                                       | 0.357389253                   | 0.009060604 |
| 100996492      | LINC01314   | long intergenic non-protein coding RNA 1314                                                          | 0.366700351                   | 0.009201076 |
| 63982          | ANO3        | anoctamin 3                                                                                          | 0.372084936                   | 0.008600399 |
| 114884         | OSBPL10     | oxysterol binding protein-like 10                                                                    | 0.377322152                   | 1.56064E-05 |
| 6566           | SLC16A1     | solute carrier family 16, member 1 (monocarboxylic acid transporter 1)                               | 0.377389214                   | 0.008899999 |
| 6045           | RNF2        | ring finger protein 2                                                                                | 0.379240231                   | 0.00262118  |
| 51099          | ABHD5       | abhydrolase domain containing 5                                                                      | 0.38334089                    | 0.005300446 |
| 9699           | RIMS2       | regulating synaptic membrane exocytosis 2                                                            | 0.38701032                    | 0.000579041 |
| 81831          | NETO2       | neuropilin (NRP) and tolloid (TLL)-like 2                                                            | 0.393977566                   | 0.000965658 |
| 9143           | SYNGR3      | synaptogyrin 3                                                                                       | 0.397630789                   | 0.005052114 |
| 1875           | E2F5        | E2F transcription factor 5, p130-binding                                                             | 0.408606441                   | 0.009410234 |
| 8548           | BLZF1       | basic leucine zipper nuclear factor 1                                                                | 0.413990554                   | 0.003290634 |
| 440270         | GOLGA8B     | golgin A8 family, member B                                                                           | 0.422538873                   | 0.00471934  |
| 23236          | PLCB1       | phospholipase C, beta 1 (phosphoinositide-specific)                                                  | 0.43589904                    | 0.001873881 |
| 2890           | GRIA1       | glutamate receptor, ionotropic, AMPA 1                                                               | 0.436494345                   | 0.009682402 |
| 93408          | MYL10       | myosin, light chain 10, regulatory                                                                   | 0.439384927                   | 0.008276491 |
| 5937           | RBMS1       | RNA binding motif, single stranded interacting protein 1                                             | 0.441701035                   | 0.009373718 |
| 8470           | SORBS2      | sorbin and SH3 domain containing 2                                                                   | 0.444625873                   | 0.000784413 |
| 64771          | C6orf106    | chromosome 6 open reading frame 106                                                                  | 0.446598876                   | 0.009694381 |
| 27324          | TOX3        | TOX high mobility group box family member 3                                                          | 0.450425735                   | 0.002724595 |
| 5994           | RFXAP       | regulatory factor X-associated protein                                                               | 0.451935762                   | 0.006501679 |
| 6000           | RGS7        | regulator of G-protein signaling 7                                                                   | 0.451971533                   | 0.006045425 |
| 138046         | RALYL       | RALY RNA binding protein-like                                                                        | 0.453463038                   | 0.001029166 |
| 53335          | BCL11A      | B-cell CLL/lymphoma 11A (zinc finger protein)                                                        | 0.457377016                   | 0.004390769 |
| 8604           | SLC25A12    | solute carrier family 25 (mitochondrial carrier, Aralar), member 12                                  | 0.457499507                   | 0.00019237  |
| 22986          | SORCS3      | sortilin-related VPS10 domain containing receptor 3                                                  | 0.459432107                   | 0.003125207 |
| 5530           | PPP3CA      | protein phosphatase 3, catalytic subunit, alpha isozyme                                              | 0.461727097                   | 0.001385837 |
| 23392          | KIAA0368    | KIAA0368                                                                                             | 0.462082599                   | 0.003454136 |
| 1020           | CDK5        | cyclin-dependent kinase 5                                                                            | 0.464742579                   | 0.00340998  |
| 5577           | PRKAR2B     | protein kinase, cAMP-dependent, regulatory, type II, beta                                            | 0.465879457                   | 0.002607569 |

|              |                       |                                                                                          |                    |                    |
|--------------|-----------------------|------------------------------------------------------------------------------------------|--------------------|--------------------|
| 9856         | KIAA0319              | KIAA0319                                                                                 | 0.466821918        | 0.003104747        |
| 9750         | FAM65B                | family with sequence similarity 65, member B                                             | 0.469502963        | 0.003648222        |
| 57863        | CADM3                 | cell adhesion molecule 3                                                                 | 0.470400343        | 0.001417647        |
| 4121         | MAN1A1                | mannosidase, alpha, class 1A, member 1                                                   | 0.470575788        | 0.007786277        |
| 23281        | MTUS2                 | microtubule associated tumor suppressor candidate 2                                      | 0.475295934        | 0.007578628        |
| 23167        | EFR3A                 | EFR3 homolog A (S. cerevisiae)                                                           | 0.480846757        | 0.004322177        |
| 3039         | HBA1                  | hemoglobin, alpha 1                                                                      | 0.481011431        | 0.006622563        |
| 4907         | NT5E                  | 5'-nucleotidase, ecto (CD73)                                                             | 0.481199125        | 0.008511804        |
| 4830         | NME1                  | non-metastatic cells 1, protein (NM23A) expressed in                                     | 0.482930377        | 0.004989266        |
| 3048         | HBG2                  | hemoglobin, gamma G                                                                      | 0.483511346        | 0.001076114        |
| 3751         | KCND2                 | potassium voltage-gated channel, Shal-related subfamily, member 2                        | 0.489787298        | 0.004105453        |
| 27324        | TOX3                  | TOX high mobility group box family member 3                                              | 0.490769258        | 0.005222024        |
| 10129        | FRY                   | furry homolog (Drosophila)                                                               | 0.49309084         | 0.00556954         |
| 3191         | HNRNPL                | heterogeneous nuclear ribonucleoprotein L                                                | 0.499634764        | 0.003832929        |
| 8502         | PKP4                  | plakophilin 4                                                                            | 0.50203014         | 0.001264843        |
| 3708         | ITPR1                 | inositol 1,4,5-triphosphate receptor, type 1                                             | 0.50283747         | 0.002087049        |
| 6722         | SRF                   | serum response factor (c-fos serum response element-binding transcription factor)        | 0.507259691        | 0.009083026        |
| 9071         | CLDN10                | claudin 10                                                                               | 0.512449482        | 0.005138908        |
| 2335         | FN1                   | fibronectin 1                                                                            | 0.51287327         | 0.003377587        |
| 9922         | IQSEC1                | IQ motif and Sec7 domain 1                                                               | 0.517453432        | 0.000135105        |
| 79567        | FAM65A                | family with sequence similarity 65, member A                                             | 0.517677872        | 0.005148038        |
| 23157        | SEPT6                 | septin 6                                                                                 | 0.521243095        | 1.94717E-05        |
| 6310         | ATXN1                 | ataxin 1                                                                                 | 0.529973111        | 0.000693097        |
| 1107         | CHD3                  | chromodomain helicase DNA binding protein 3                                              | 0.531318284        | 0.002487892        |
| 79101        | TAF1D                 | TATA box binding protein (TBP)-associated factor, RNA polymerase I, D, 41kDa             | 0.534934964        | 0.006396605        |
| 9821         | RB1CC1                | RB1-inducible coiled-coil 1                                                              | 0.535541656        | 0.003745766        |
| 55757        | UGGT2                 | UDP-glucose glycoprotein glucosyltransferase 2                                           | 0.535558689        | 0.001405379        |
| 29114        | TAGLN3                | transgelin 3                                                                             | 0.536481218        | 0.00215522         |
| 9590         | AKAP12                | A kinase (PRKA) anchor protein 12                                                        | 0.538894732        | 8.64065E-05        |
| 57496        | MKL2                  | MKL/myocardin-like 2                                                                     | 0.541306767        | 0.009963246        |
| 53353        | LRP1B                 | low density lipoprotein receptor-related protein 1B                                      | 0.541847962        | 0.004672477        |
| 23231        | SEL1L3                | sel-1 suppressor of lin-12-like 3 (C. elegans)                                           | 0.542192244        | 0.007063601        |
| 56943        | ENY2                  | enhancer of yellow 2 homolog (Drosophila)                                                | 0.544071595        | 0.009527721        |
| 79762        | C1orf115              | chromosome 1 open reading frame 115                                                      | 0.546532572        | 0.005130192        |
| 10846        | PDE10A                | phosphodiesterase 10A                                                                    | 0.549157947        | 0.002263882        |
| 1349         | COX7B                 | cytochrome c oxidase subunit VIIb                                                        | 0.553088625        | 0.004051697        |
| 65981        | CAPRN2                | caprin family member 2                                                                   | 0.555441174        | 0.00066017         |
| 7534         | YWHAZ                 | tyrosine 3-monooxygenase/tryptophan 5-monooxygenase activation protein, zeta polypeptide | 0.556167619        | 0.006101886        |
| 1337         | COX6A1                | cytochrome c oxidase subunit VIa polypeptide 1                                           | 0.557465998        | 0.001751281        |
| 9353         | SLIT2                 | slit homolog 2 (Drosophila)                                                              | 0.558570719        | 0.009460307        |
| 26507        | CNNM1                 | cyclin M1                                                                                | 0.5599908          | 0.005691077        |
| 93664        | CADPS2                | Ca <sup>++</sup> -dependent secretion activator 2                                        | 0.560315994        | 0.002336932        |
| 509          | ATP5C1                | ATP synthase, H <sup>+</sup> transporting, mitochondrial F1 complex, gamma polypeptide 1 | 0.563516199        | 0.005837604        |
| 491          | ATP2B2                | ATPase, Ca <sup>++</sup> transporting, plasma membrane 2                                 | 0.564364625        | 0.008806963        |
| 91851        | CHRDL1                | chordin-like 1                                                                           | 0.565566821        | 0.003016121        |
| 56252        | YLPM1                 | YLP motif containing 1                                                                   | 0.566024088        | 0.00755332         |
| 377          | ARF3                  | ADP-ribosylation factor 3                                                                | 0.567332148        | 0.005452724        |
| 4862         | NPAS2                 | neuronal PAS domain protein 2                                                            | 0.567397135        | 0.007890075        |
| <b>63974</b> | <b><u>NEUROD6</u></b> | <b><u>neurogenic differentiation 6</u></b>                                               | <b>0.568549476</b> | <b>0.007199422</b> |
| 9452         | ITM2A                 | integral membrane protein 2A                                                             | 0.56961321         | 0.001581406        |
| 5162         | PDHB                  | pyruvate dehydrogenase (lipoamide) beta                                                  | 0.573206217        | 0.006116724        |
| 4714         | NDUFB8                | NADH dehydrogenase (ubiquinone) 1 beta subcomplex, 8, 19kDa                              | 0.578140448        | 0.001083971        |
| 22941        | SHANK2                | SH3 and multiple ankyrin repeat domains 2                                                | 0.580635291        | 0.006476589        |
| 6529         | SLC6A1                | solute carrier family 6 (neurotransmitter transporter, GABA), member 1                   | 0.582511461        | 0.004142352        |
| 58189        | WFDC1                 | WAP four-disulfide core domain 1                                                         | 0.582843283        | 0.002318206        |
| 1008         | CDH10                 | cadherin 10, type 2 (T2-cadherin)                                                        | 0.584467028        | 0.002335459        |
| 23518        | R3HDM1                | R3H domain containing 1                                                                  | 0.590781827        | 0.009081363        |
| 9994         | CASP8AP2              | caspase 8 associated protein 2                                                           | 0.591049072        | 0.002678888        |
| 9168         | TMSB10                | thymosin beta 10                                                                         | 0.591288491        | 0.000133143        |
| 2744         | GLS                   | glutaminase                                                                              | 0.591660135        | 0.007897416        |
| 2915         | GRM5                  | glutamate receptor, metabotropic 5                                                       | 0.592186084        | 0.00764757         |
| 576          | BAI2                  | brain-specific angiogenesis inhibitor 2                                                  | 0.593582138        | 0.008425238        |
| 64788        | LMF1                  | lipase maturation factor 1                                                               | 0.596678442        | 0.004542002        |
| 9847         | KIAA0528              | KIAA0528                                                                                 | 0.599243843        | 0.006295878        |

The set of 131 DEGs downregulated in the hippocampal CA1 region among incipient, moderate, and severe AD and NC groups by one-way ANOVA satisfying p-Value < 0.01 and fold change of severe AD versus NC smaller than 0.6 were extracted by microarray data analysis of GSE1297. They are listed with Entrez Gene ID, Gene Symbol, Gene Name, Fold Change, and p-Value. NEUROD6 is underlined.

**Supplementary TABLE 5. The set of 31 DEGs downregulated in the hippocampus of Japanese AD patients identified by microarray data analysis of GSE36980**

| Entrez Gene ID | Gene Symbol           | Gene Name                                                                                              | Fold Change (AD vs non-AD) | p-Value     |
|----------------|-----------------------|--------------------------------------------------------------------------------------------------------|----------------------------|-------------|
| 4233           | MET                   | met proto-oncogene (hepatocyte growth factor receptor)                                                 | 0.347976759                | 0.001202064 |
| <b>63974</b>   | <b><u>NEUROD6</u></b> | <b><u>neurogenic differentiation 6</u></b>                                                             | 0.433171474                | 0.001616741 |
| 5816           | PVALB                 | parvalbumin                                                                                            | 0.457320297                | 0.001537504 |
| 4885           | NPTX2                 | neuronal pentraxin II                                                                                  | 0.486879325                | 0.000695301 |
| 10368          | CACNG3                | calcium channel, voltage-dependent, gamma subunit 3                                                    | 0.496685808                | 0.004499281 |
| 3208           | HPCA                  | hippocalcin                                                                                            | 0.504149269                | 0.000333079 |
| 5176           | SERPINF1              | serpin peptidase inhibitor, clade F (alpha-2 antiplasmin, pigment epithelium derived factor), member 1 | 0.522226034                | 0.00019849  |
| 348980         | HCN1                  | hyperpolarization activated cyclic nucleotide-gated potassium channel 1                                | 0.523810594                | 0.004508668 |
| 376267         | RAB15                 | RAB15, member RAS oncogene family                                                                      | 0.537387889                | 0.001299325 |
| 3595           | IL12RB2               | interleukin 12 receptor, beta 2                                                                        | 0.538167968                | 0.00328347  |
| 2675           | GFRA2                 | GDNF family receptor alpha 2                                                                           | 0.539054643                | 0.001333403 |
| 407052         | MIR95                 | microRNA 95                                                                                            | 0.542735216                | 0.001639895 |
| 161145         | TMEM229B              | chromosome 14 open reading frame 83                                                                    | 0.545710178                | 0.000720208 |
| 5774           | PTPN3                 | protein tyrosine phosphatase, non-receptor type 3                                                      | 0.54910964                 | 0.001537752 |
| 23349          | KIAA1045              | KIAA1045                                                                                               | 0.55244187                 | 0.003426591 |
| 8507           | ENC1                  | ectodermal-neural cortex (with BTB-like domain)                                                        | 0.559652363                | 0.003288053 |
| 266722         | HS6ST3                | heparan sulfate 6-O-sulfotransferase 3                                                                 | 0.560440342                | 0.001753288 |
| 53335          | BCL11A                | B-cell CLL/lymphoma 11A (zinc finger protein)                                                          | 0.56767029                 | 0.002900497 |
| 6304           | SATB1                 | SATB homeobox 1                                                                                        | 0.570165581                | 0.001900759 |
| 64409          | WBSR17                | Williams-Beuren syndrome chromosome region 17                                                          | 0.572117803                | 0.003646413 |
| 84894          | LINGO1                | leucine rich repeat and Ig domain containing 1                                                         | 0.574936403                | 0.000424171 |
| 84525          | HOPX                  | HOP homeobox                                                                                           | 0.577157339                | 0.000987151 |
| 2903           | GRIN2A                | glutamate receptor, ionotropic, N-methyl D-aspartate 2A                                                | 0.581203611                | 0.002390123 |
| 5138           | PDE2A                 | phosphodiesterase 2A, cGMP-stimulated                                                                  | 0.583469267                | 0.002990823 |
| 51299          | NRN1                  | neuritin 1                                                                                             | 0.590013553                | 0.001828335 |
| 125113         | KRT222                | keratin 222 pseudogene                                                                                 | 0.592296133                | 0.004941811 |
| 1428           | CRYM                  | crystallin, mu                                                                                         | 0.594516424                | 0.002824762 |
| 646113         | LINC00643             | long intergenic non-protein coding RNA 643                                                             | 0.59477003                 | 0.004445109 |
| 5923           | RASGRF1               | Ras protein-specific guanine nucleotide-releasing factor 1                                             | 0.59493107                 | 0.004924286 |
| 221692         | PHACTR1               | phosphatase and actin regulator 1                                                                      | 0.597310446                | 0.002464967 |
| 23467          | NPTXR                 | neuronal pentraxin receptor                                                                            | 0.597403904                | 4.42886E-05 |

The set of 31 DEGs downregulated in the hippocampus of Japanese AD patients satisfying p-Value < 0.005 by two-tailed t-test and fold change smaller than 0.6 were extracted by microarray data analysis of GSE36980. They are listed with Entrez Gene ID, Gene Symbol, Gene Name, Fold Change, and p-Value. NEUROD6 is underlined.
